# Supplementary material for: Efficient charge transfer from organometal lead halide perovskite nanocrystals to free base meso-tetraphenylporphyrins
Source: Royal Society of Chemistry journal article supplement (doi:10.1039/d1na00835h), 2022-01-01
Supplement: d1na00835h1.pdf [file d1na00835h1.pdf]

**Supporting Information**

**Efficient Charge Transfer from Organometal Lead Halide Perovskite  
Nanocrystals to Free Base *Meso*-Tetraphenylporphyrins**

Abha Jha<sup>a</sup>, Hari Shankar<sup>a</sup>, Sandeep Kumar<sup>a</sup>, M. Sankar<sup>a</sup> and Prasenjit Kar<sup>a\*</sup>

<sup>a</sup>Department of Chemistry, Indian Institute of Technology Roorkee, Uttarakhand 247667, India

Email id: [kar.prasen@gmail.com](mailto:kar.prasen@gmail.com), [prasenjit.kar@iitr.ac.in](mailto:prasenjit.kar@iitr.ac.in)

## Table of Content

**Figure S1**  $^1\text{H}$  NMR Spectrum of TPP in  $\text{CDCl}_3$  at 298 K.

**Figure S2.** Fluorescence spectra of blue, green and red luminescent  $\text{MAPbX}_3$  ( $X = \text{Br, I}$ ) perovskite nanocrystals solution with addition of 100  $\mu\text{L}$  of solvent ( $\text{CHCl}_3$ ).

**Figure S3.** Fluorescence spectra of TPP solution after dilution with Chloroform solvent.

**Figure S4.** Excitation spectra of (a) PS-A (b) PS-A@TPP (c) PS-B (d) PS-B@TPP (e) PS-C (f) PS-C@TPP (g) TPP.

**Figure S5.** XRD pattern of  $\text{MAPbBr}_3$ @TPP nanocomposites.

**Figure S6.** XRD pattern of (a) green luminescent  $\text{MAPbBr}_3$  and (b) red luminescent  $\text{MAPbI}_3$  perovskite nanocrystal.

**Figure S7 (a).**  $^1\text{H}$  -NMR spectra of TPP in presence of PNCs in  $\text{CDCl}_3$  solvent. **(b).**  $^1\text{H}$ -NMR spectra of TPP molecules in  $\text{CDCl}_3$  solvent.

**Figure S8.** FT-IR spectra of TPP in the presence and absence of PNCs.

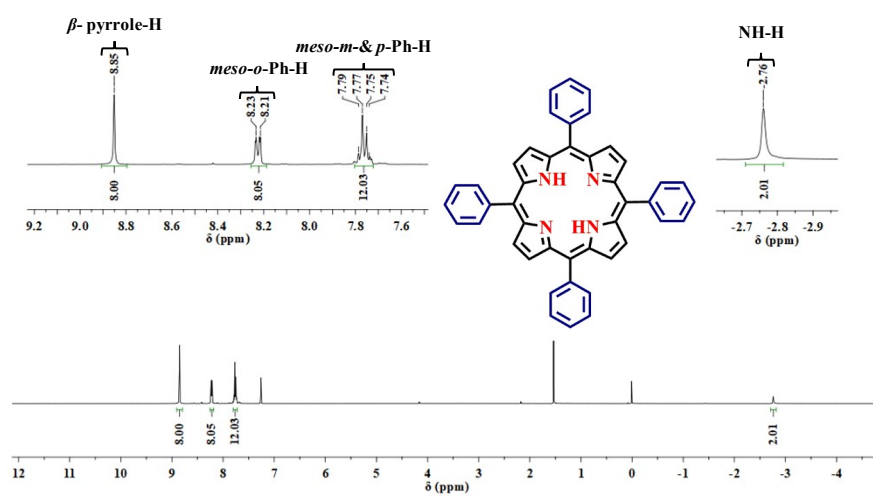

**Figure S1**  $^1\text{H-NMR}$  Spectrum of TPP in  $\text{CDCl}_3$  at 298 K.

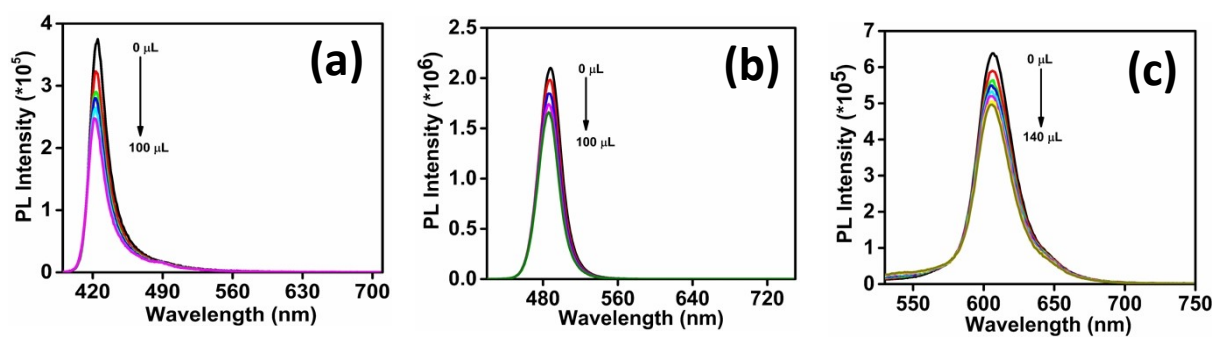

**Figure S2.** Fluorescence spectra of blue, green and red luminescent MAPbX<sub>3</sub> (X = Br, I) perovskite nanocrystals solution with addition of 100 μL of solvent (CHCl<sub>3</sub>).

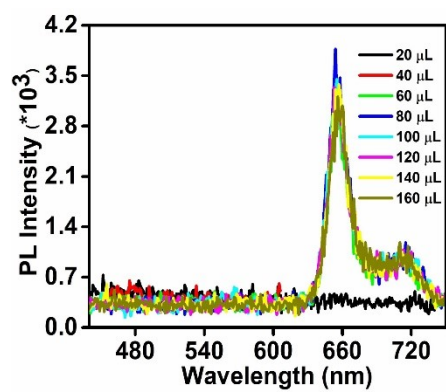

**Figure S3.** Fluorescence spectra of TPP solution after dilution with Chloroform solvent.

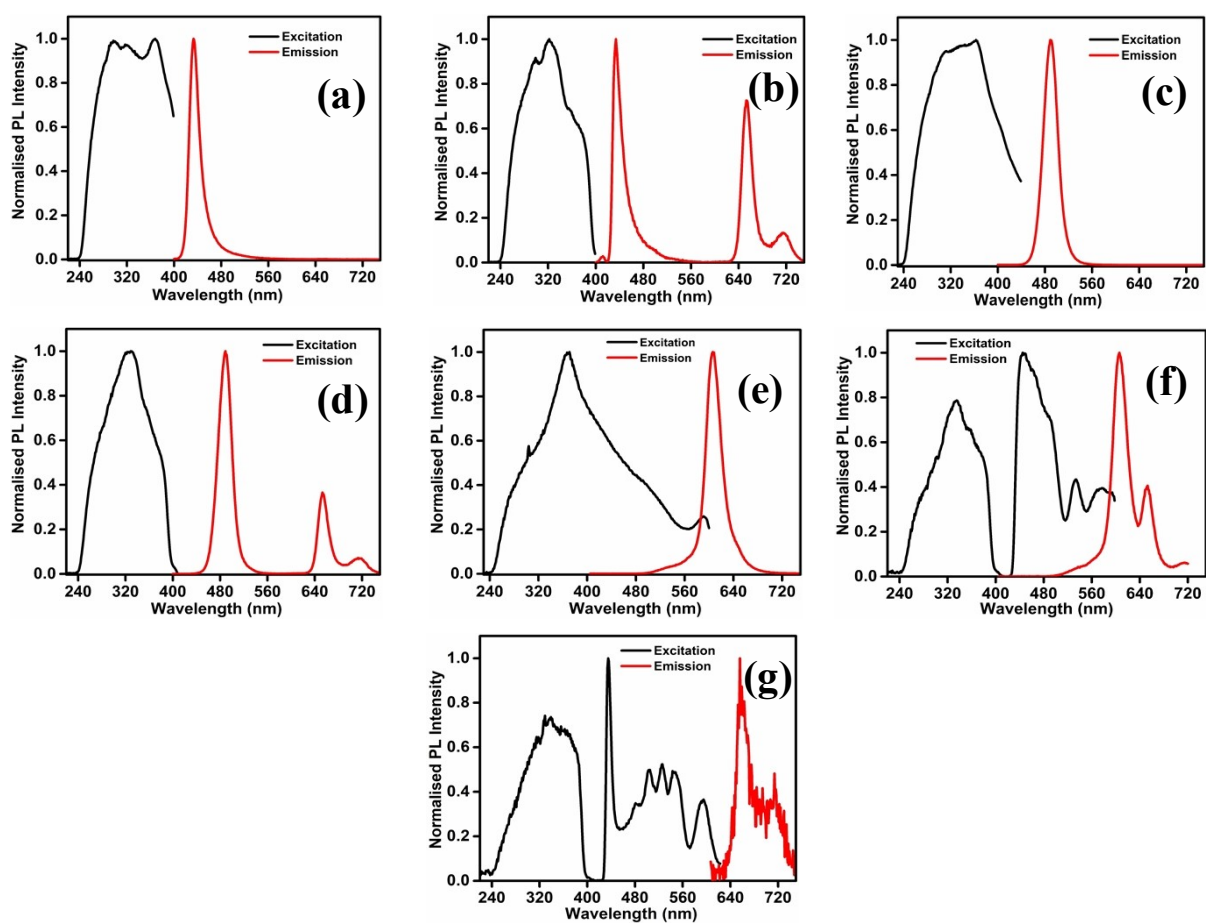

**Figure S4.** Excitation spectra of (a) PS-A (b) PS-A@TPP (c) PS-B (d) PS-B@TPP (e) PS-C (f) PS-C@TPP (g) TPP.

The excitation spectra of PNCs and PNCs@TPP were recorded at the emission wavelength of respective fluorescent perovskite nanocrystals.

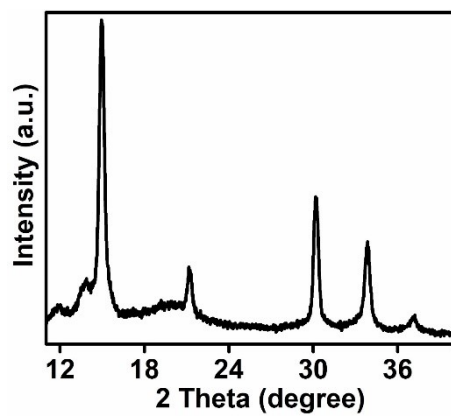

**Figure S5.** XRD pattern of MAPbBr<sub>3</sub>@TPP nanocomposites.

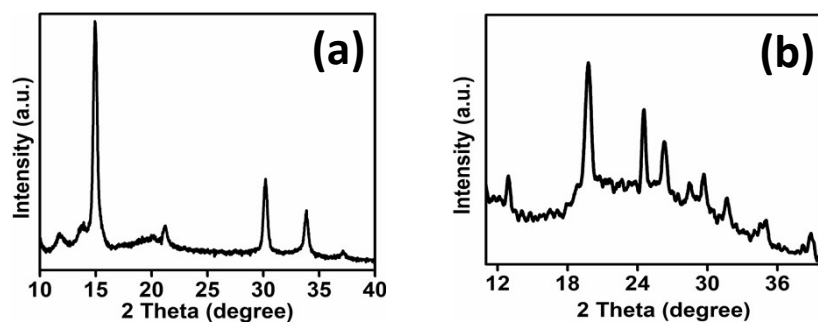

**Figure S6.** XRD pattern of (a) green luminescent MAPbBr<sub>3</sub> and (b) red luminescent MAPbI<sub>3</sub> perovskite nanocrystal.



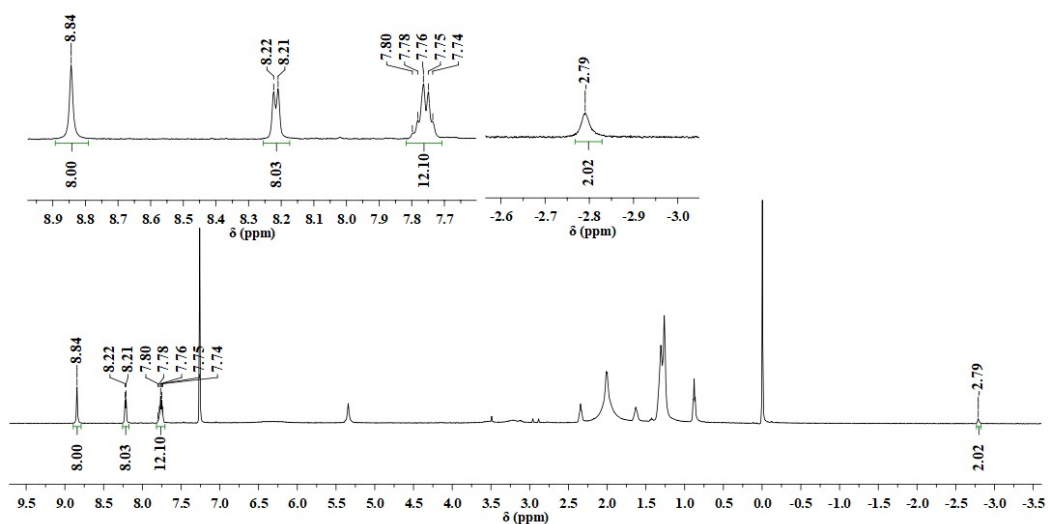

**Figure S7(a).**  $^1\text{H}$ -NMR spectra of PNCs@TPP nanocomposites in  $\text{CDCl}_3$  solvent.

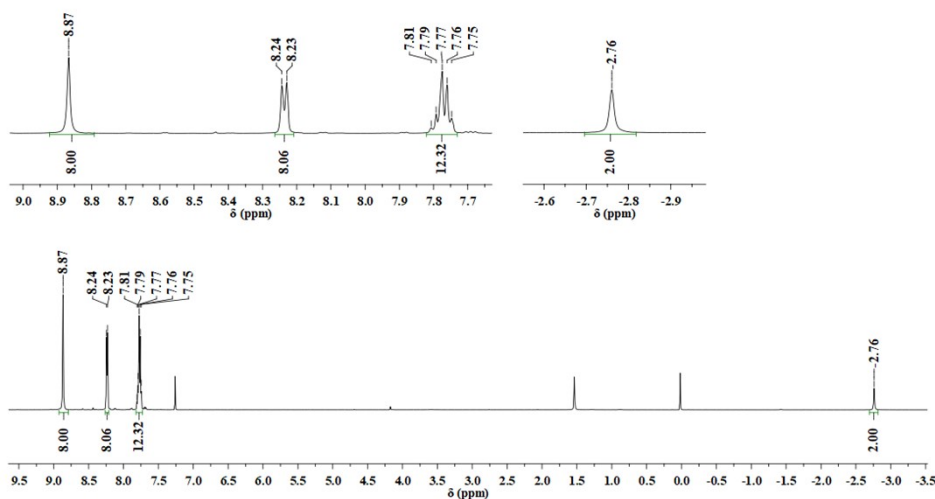

**Figure S7(b).**  $^1\text{H}$ -NMR spectra of TPP molecules in  $\text{CDCl}_3$  solvent.

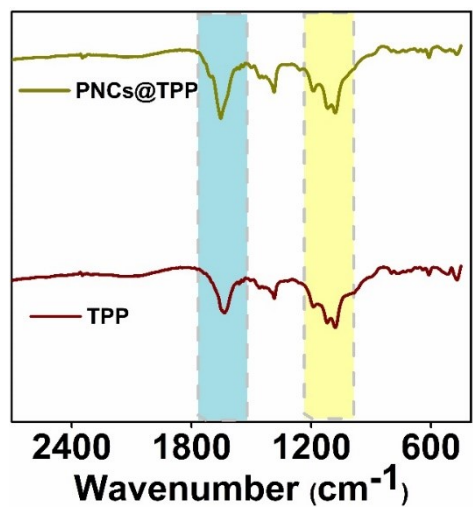

**Figure S8.** FT-IR spectra of TPP in the presence and absence of PNCs.
